# Supplementary material for: Observation of Griffiths phase-like magnetic behavior in a frustrated antiferromagnetic system: Sr2InRuO6
Source: Royal Society of Chemistry journal article supplement (doi:10.1039/d4nj03088e), 2024-01-01
Supplement: d4nj03088e1.pdf [file d4nj03088e1.pdf]

## Supplementary Information

### Observation of Griffith's phase-like magnetic behavior in a frustrated antiferromagnetic system: $\text{Sr}_2\text{InRuO}_6$

Sumanta Mukherjee <sup>a</sup>

<sup>a</sup> Solid State and Structural Chemistry Unit, Indian Institute of Science, Bangalore 560012, India

Figure S1: **Fig. S1 (a)** shows the X-ray diffraction (*XRD*) patterns of sample 1 (synthesized at 1250 °C) and sample 2 (synthesized at 1050-1150 °C, see manuscript). *XRD* patterns of both samples match well with the standard *XRD* pattern of  $\text{Sr}_2\text{YRuO}_6$  and suggest the synthesis of the desired materials. Further, the impurity peak (shown by the star mark in **Fig. S1** inset) has diminished in the sample synthesized at lower temperatures. This further suggests that the minute (3% - 5%) nonmagnetic impurity peak of *h*- $\text{In}_2\text{O}_3$  is resulting from the Ru sublimation at higher temperatures. **Fig. S1 (b)** and **(c)** show the simulated *XRD* patterns, using the standard *XRD* data of  $\text{Sr}_2\text{YRuO}_6$  (ICSD collection code 192766) along with the experimental *XRD* patterns of sample 1 and sample 2. FullProf software was used for the structural refinements. The obtained structural information, like space group, lattice parameters and atomic positions are tabulated in *Table S1* and *Table S2*.

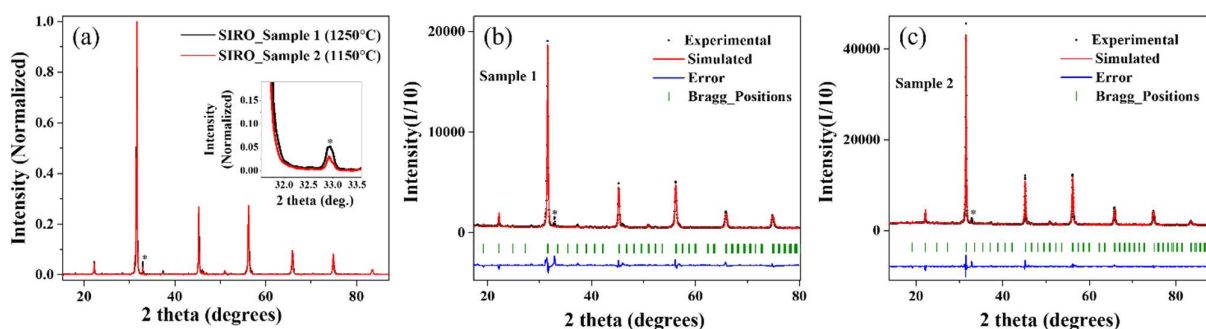

**Fig. S1:** (a) *XRD* patterns of sample 1 and sample 2 are shown. The inset shows an enlarge view of the nonmagnetic *h*- $\text{In}_2\text{O}_3$  impurity peak. The *XRD* patterns were aligned at the highest intensity peak position for a better comparison. (b) and (c) show the simulated diffraction patterns along with the experimental *XRD* patterns of sample 1 and sample 2, respectively.

**Table S1:** Table S1 provides the structural information, like lattice parameters, space group and goodness of fit obtained from the refinement of the XRD patterns of sample 1 and sample 2.

| Sample               | a (Å)                      | b (Å)                      | c (Å)                      | $\beta$ (deg)               | Space group         | $R_p$        | $R_{wp}$ | $\chi^2$ |
|----------------------|----------------------------|----------------------------|----------------------------|-----------------------------|---------------------|--------------|----------|----------|
| Sample 1<br>(1250°C) | 5.6654<br>( $\pm 0.0011$ ) | 5.6746<br>( $\pm 0.0009$ ) | 8.0172<br>( $\pm 0.0024$ ) | 90.0813<br>( $\pm 0.1626$ ) | P 2 <sub>1</sub> /n | 4.33         | 7.61     | 4.23     |
| Sample 2<br>(1150°C) | 5.6729<br>( $\pm 0.0010$ ) | 5.6774<br>( $\pm 0.0009$ ) | 8.0129<br>( $\pm 0.0012$ ) | 90.0478<br>( $\pm 0.0192$ ) | P 2 <sub>1</sub> /n | 2.36         | 4.02     | 2.78     |
|                      |                            |                            |                            |                             |                     | Conventional |          |          |
|                      |                            |                            |                            |                             |                     | 14.6         | 11.7     | 2.783    |

**Table S2:** Table S2 provides the atomic positions obtained from the refinement of the XRD patterns of the synthesized samples.

| Atomic Coordinates |         |         |          |
|--------------------|---------|---------|----------|
| Atom               | x       | y       | z        |
| Sr                 | 0.00282 | 0.00778 | 0.24385  |
| In                 | 0.50000 | 0.00000 | 0.00000  |
| Ru                 | 0.50000 | 0.00000 | 0.50000  |
| O1                 | 0.35310 | 0.30045 | -0.03100 |
| O2                 | 0.23153 | 0.78701 | 0.00011  |
| O3                 | 0.01450 | 0.47661 | 0.24959  |

**Figure S2:** A characteristic of the formation of Griffith's phase (GP) in certain systems is the power law variation of inverse susceptibility,  $\chi^{-1}$ , given by an equation of the form  $\chi^{-1} = (T - T_c^{rand})^{1-\lambda_G}$ , where  $0 \leq \lambda_G < 1$ <sup>1,2,3</sup>. To estimate the value of the exponent  $\lambda_G$ , both Curie-Weiss temperature ( $\theta_{cw}$ ) and transition temperature ( $T_N$  or  $T_C$ ) have previously been used for  $T_c^{rand}$ . However, for antiferromagnetic systems<sup>1</sup>, a better choice for  $T_c^{rand}$  is a value close to  $\theta_{cw}$ , which makes  $\lambda_G$  approximately zero in the paramagnetic phase. We have used a  $T_c^{rand}$  value of  $\approx -257$  K, which is very close to the  $\theta_{cw}$  ( $\approx -265$  K) of  $\text{Sr}_2\text{InRuO}_6$  obtained from the Curie-Weiss fitting of the inverse susceptibility data shown in **Fig. 3(d)** of the main manuscript, to ensure  $\lambda_G$  to be nearly zero in the paramagnetic phase. A linear fit (**Fig. S2**) of the low

temperature region thus obtained the value of  $\lambda_G$  to be  $\sim 0.624$ . This estimated exponent is in close agreement with the values obtained for several GP-containing compounds<sup>1,2,3</sup>.

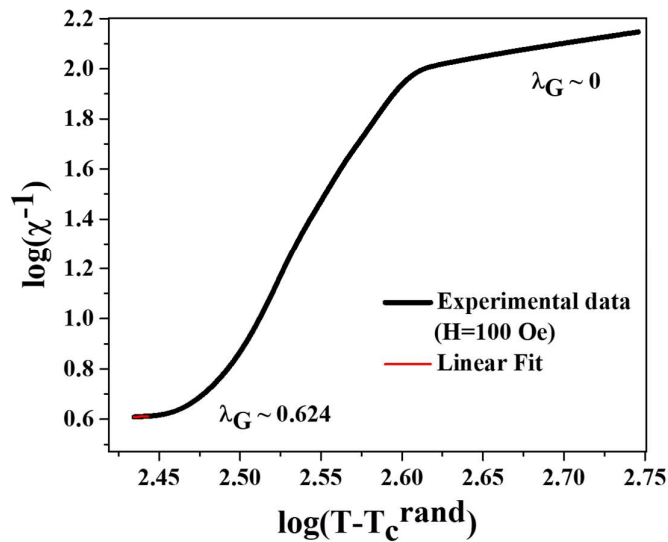

**Fig. S2:** A log-log plot  $\chi^{-1}$  vs  $(T - T_c^{rand})$  is shown. Red line shows the linear fit. The extracted value of  $\lambda_G$  from the linear fit is provided.

Figure S3:

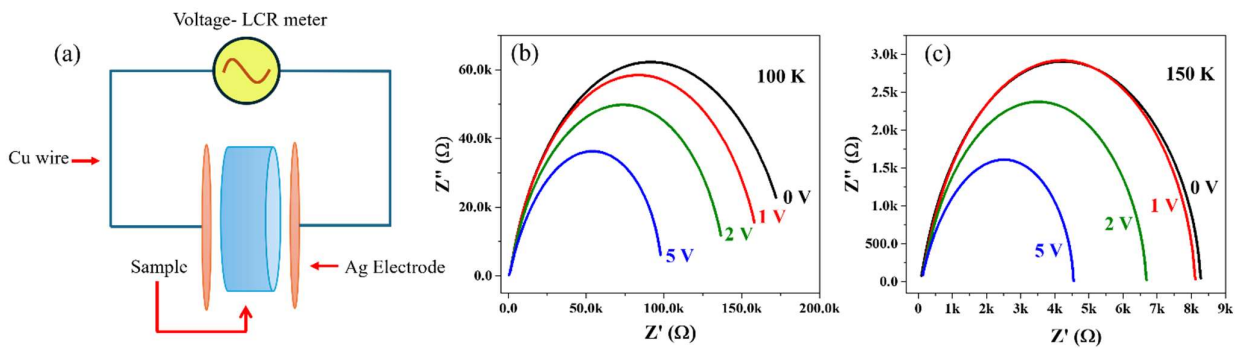

**Fig. S3:** (a) A schematic representation of the dielectric measurement setup. The Nyquist (Cole-Cole) plots (b) and (c), obtained from the measured complex impedance ( $Z^*$ ) of the SIRO sample at 100 K and 150 K, respectively, are asymmetric. This suggests the presence of more than one R-C element in the circuit. The effects of dc-bias are clearly visible in these plots.

## References:

- 1) Z. W. Ouyang, N. M. Xia, Y. Y. Wu, S. S. Sheng, J. Chen, Z. C. Xia, L. Li, and G. H. Rao, Short-range ferromagnetic correlations in the spin-chain compound  $\text{Ca}_3\text{CoMnO}_6$ , *Phys. Rev. B*, 2011, **84**, 054435.
- 2) W. Jiang, X. Z. Zhou, G. Williams, Y. Mukovskii, and K. Glazyrin, Griffiths phase and critical behavior in singlecrystal  $\text{La}_{0.7}\text{Ba}_{0.3}\text{MnO}_3$ : Phase diagram for  $\text{La}_{1-x}\text{Ba}_x\text{MnO}_3$  ( $x \leq 0.33$ ), *Phys. Rev. B*, 2008, **77**, 064424.
- 3) S. Guo, D. P. Young, R. T. MacAluso, D. A. Browne, N. L. Henderson, J. Y. Chan, L. L. Henry, and J. F. Ditusa, Discovery of the Griffiths phase in the itinerant magnetic semiconductor  $\text{Fe}_{1-x}\text{Co}_x\text{S}_2$ , *Phys. Rev. Lett.*, 2008, **100**, 017209.
